# Supplementary material for: Hair follicle melanocyte precursors are awoken by ultraviolet radiation via a cell extrinsic mechanism
Source: Royal Society of Chemistry journal article supplement (doi:10.1039/c5pp00098j), 2015-05-05

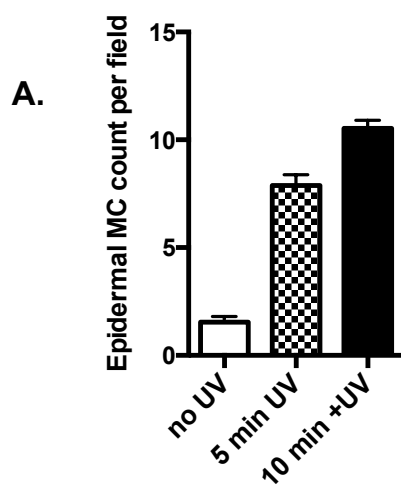

**B. UVR-induced DNA damage in neonatal mouse skin (Immunofluorescence)**  
3h after neonatal UVR

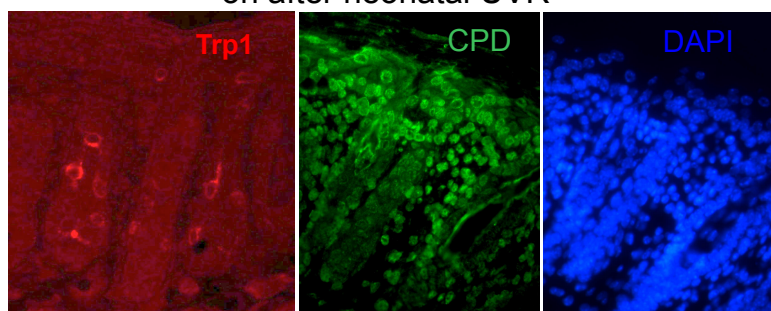

**C. UVR-induced DNA damage in neonatal mouse skin (Immunohistochemistry)**

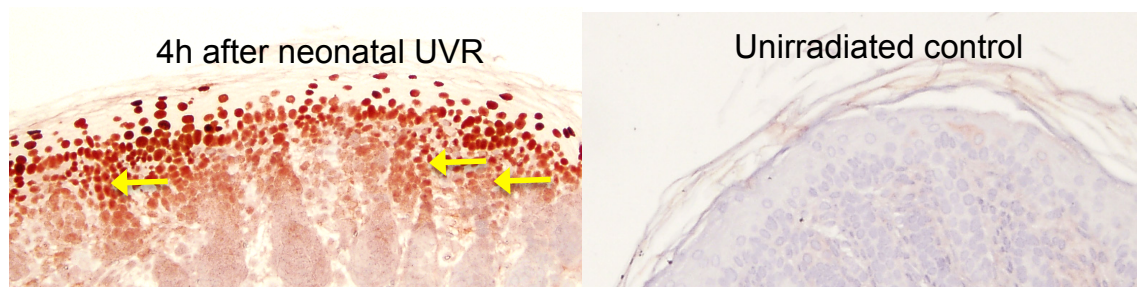

Supplement: c5pp00098j2.pdf [file c5pp00098j2.pdf]
