# Supplementary figures and images for: Hair follicle melanocyte precursors are awoken by ultraviolet radiation via a cell extrinsic mechanism
Source: Royal Society of Chemistry journal article supplement (doi:10.1039/c5pp00098j), 2015-05-05

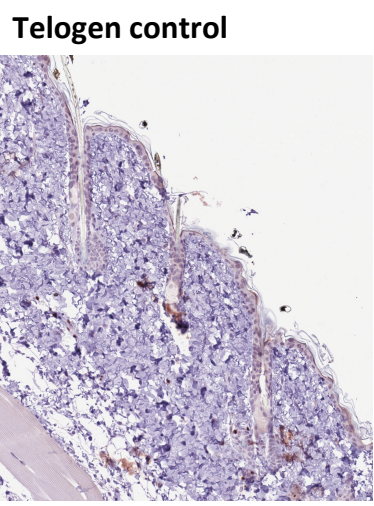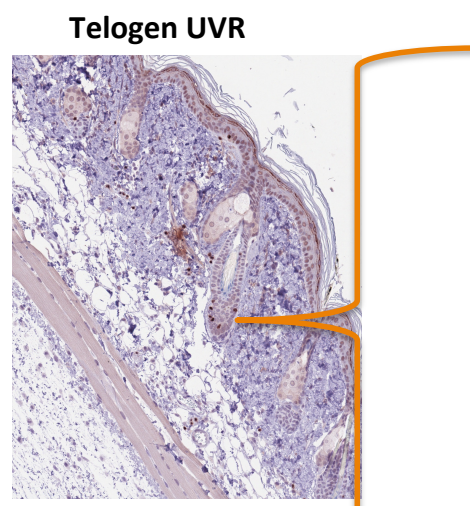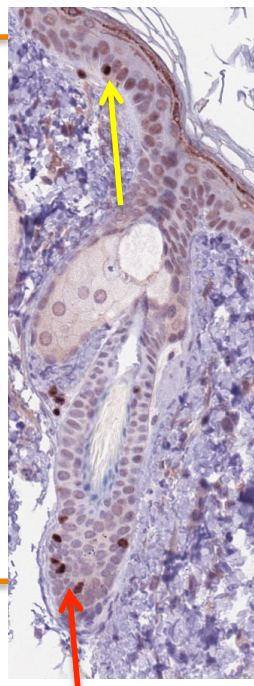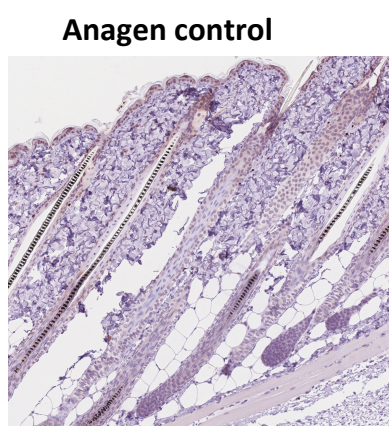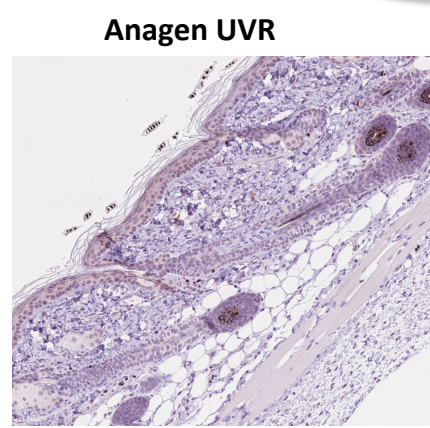

Supplement: c5pp00098j1.pdf [file c5pp00098j1.pdf]
